# Supplementary material for: Potential Role of the Mitochondria for the Dermatological Treatment of Papillon-Lefèvre
Source: PubMed Central journal article supplement (PMC7827181; doi:10.3390/antiox10010095), 2021-01-12
Supplement: antioxidants-10-00095-s001.pdf [file antioxidants-10-00095-s001.pdf]

## Potential role of the mitochondria for the dermatological treatment of Papillon Lefevre

**Table S1.** Characteristic findings of PLS patients and controls

|                       | Control 1 | Control 2 | Patient 1 | Patient 2               |
|-----------------------|-----------|-----------|-----------|-------------------------|
| Age (yr)              | 42        | 41        | 21        | 21                      |
| Periodontal damage    | No        | No        | Yes       | Yes                     |
| Dermatological damage | No        | No        | Yes       | Yes                     |
| Sex                   | Male      | Male      | Female    | Male                    |
| CTSC Mutation         | No        | No        | c.1286>A  | c.96T>G and<br>c.401G>A |
| Amino acid change     | No        | No        | p.W429*   | p.Y32* and<br>p.W134*   |

**Table S2.** Summary of sequencing results in control fibroblasts.

|         | <b>Control 1</b> | <b>Control2</b>  |
|---------|------------------|------------------|
| MT-RNR1 | A750G<br>A1438G  | A750G<br>A1438G  |
| MT-RNR2 | A2706G<br>T3197C |                  |
| MT-ND1  | A3564G           | T3777C<br>G3915A |
| MT-ND2  | A4769G           | A4727G<br>A4769G |
| MT-CO1  | A6040G<br>C7028T |                  |
| MT-CO2  |                  | G7805A           |
| MT-TS1  |                  |                  |

|          |                                                                                 |                                                                                 |
|----------|---------------------------------------------------------------------------------|---------------------------------------------------------------------------------|
| MT-ATP6  | T8610C<br>G8838A<br>A8860G                                                      | A8860G                                                                          |
| MT-CO3   |                                                                                 | G9380A                                                                          |
| MT-ND4   | C11054T<br>A11467G<br>G11719A                                                   | T11253C                                                                         |
| MT-ND5   | G12376A<br>T13617C                                                              |                                                                                 |
| MT-CYB   | C14766T<br>A15326G                                                              | A15326G                                                                         |
| MT-TT    |                                                                                 |                                                                                 |
| MT-DLOOP | C16192T<br>C16256T<br>C16270T<br>A16399G<br>T16519C<br>A73G<br>A263G<br>310insC | T16362C<br>A16482G<br>C150T<br>T239C<br>A263G<br>302insCC<br>310insC<br>514inCA |

**Figure S1: mtDNA sequence from Patient 1**

|         |                                      |
|---------|--------------------------------------|
| MT-RNR1 | m.750A>G                             |
|         | m.1438A>G                            |
| MT-RNR2 | m.2706A>G                            |
| MT-ND1  | m.4216T>C (Tyr304His)                |
| MT-ND2  | m.4769A>G (Met100Met)                |
|         | m.5484A>G (Ile339Val) (heteroplasma) |
|         | m.5493T>C (Phe342Leu) (heteroplasma) |
| MT-CO1  | m.6671T>C (His256His)                |
|         | m.7028C>T (Ala375Ala)                |
|         | m.7076A>G (Gly391Gly)                |
| MT-CO2  |                                      |
| MT-TS1  | m7476C>T                             |
| MT-ATP6 | m.8860A>G (Thr112Ala)                |
|         | m.8958C>T (Ile144Ile)                |
| MT-CO3  |                                      |
| MT-ND3  | m.10398A>G (Thr114Ala)               |
| MT-ND4L | m.10499A>G (Leu10Leu)                |
| MT-ND4  | m.11002A>G (Gln81Gln)                |
|         | m.11016G>A (Ser86Asn)                |
|         | m.11251A>G (Leu164Leu)               |
|         | m.11377G>A (Lys206Lys)               |
|         | m.11719G>A (Gly320Gly)               |
| MT-TL2  |                                      |

**Figure S2. mtDNA sequence from family of patient 1.**

| FATHER   |                        | MOTHER   |                                       | BROTHER  |                                       |
|----------|------------------------|----------|---------------------------------------|----------|---------------------------------------|
| Mutación | 120930/JRS             | Mutación | 120929/MPV                            | Mutación | 120931/ARP                            |
| MT-RNR1  | m.750A>G               | MT-RNR1  | m.750A>G                              | MT-RNR1  | m.750A>G                              |
|          | m.1438A>G              |          | m.1438A>G                             |          | m.1438A>G                             |
| MT-RNR2  | m.1811A>G              | MT-RNR2  | m.2706A>G                             | MT-RNR2  | m.2706A>G                             |
|          | m.2706A>G              |          |                                       |          |                                       |
| MT-ND1   | m.3720A>G (Gln138Gln)  | MT-ND1   | m.4216T>C (Tyr304His)                 | MT-ND1   | m.4216T>C (Tyr304His)                 |
| MT-ND2   | m.4769A>G (Met100Met)  | MT-ND2   | m.4769A>G (Met100Met)                 | MT-ND2   | m.4769A>G (Met100Met)                 |
|          | m.5390AG (Met307Met)   |          | m.5484A>G (Ile339Val) (heteroplasmia) |          | m.5484A>G (Ile339Val) (heteroplasmia) |
|          | m.5426T>C (His319His)  |          | m.5493T>C (Phe342Leu) (heteroplasmia) |          | m.5493T>C (Phe342Leu) (heteroplasmia) |
| MT-CO1   | m.6045C>T (Leu48Leu)   | MT-CO1   | m.6671T>C (His256His)                 | MT-CO1   | m.6671T>C (His256His)                 |
|          | m.6152T>C (Val83Val)   |          | m.7028C>T (Ala375Ala)                 |          | m.7028C>T (Ala375Ala)                 |
|          | m.7028C>T (Ala375Ala)  |          | m.7076A>G (Gly391Gly)                 |          | m.7076A>G (Gly391Gly)                 |
| MT-CO2   |                        | MT-CO2   |                                       | MT-CO2   |                                       |
| MT-TS1   |                        | MT-TS1   | m.7476C>T                             | MT-TS1   | m.7476C>T                             |
| MT-ATP6  | m.8860A>G (Thr112Ala)  | MT-ATP6  | m.8860A>G (Thr112Ala)                 | MT-ATP6  | m.8860A>G (Thr112Ala)                 |
|          |                        |          | m.8958C>T (Ile144Ile)                 |          | m.8958C>T (Ile144Ile)                 |
| MT-CO3   |                        | MT-CO3   |                                       | MT-CO3   |                                       |
| MT-ND3   |                        | MT-ND3   | m.10398A>G (Thr114Ala)                | MT-ND3   | m.10398A>G (Thr114Ala)                |
| MT-ND4L  |                        | MT-ND4L  | m.10499A>G (Leu10Leu)                 | MT-ND4L  | m.10499A>G (Leu10Leu)                 |
| MT-ND4   | m.10876A>G (Leu39Leu)  | MT-ND4   | m.11002A>G (Gln81Gln)                 | MT-ND4   | m.11002A>G (Gln81Gln)                 |
|          | m.11467A>G (Leu236Leu) |          | m.11016G>A (Ser86Asn)                 |          | m.11016G>A (Ser86Asn)                 |
|          | m.11719G>A (Gly320Gly) |          | m.11251A>G (Leu164Leu)                |          | m.11251A>G (Leu164Leu)                |
|          |                        |          | m.11377G>A (Lys206Lys)                |          | m.11377G>A (Lys206Lys)                |
|          |                        |          | m.11719G>A (Gly320Gly)                |          | m.11719G>A (Gly320Gly)                |
| MT-TL2   | m.12308A>G             | MT-TL2   |                                       | MT-TL2   |                                       |
| MT-ND5   | m.12372G>A (Leu12Leu)  | MT-ND5   | m.12570A>G (Leu78Leu)                 | MT-ND5   | m.12570A>G (Leu78Leu)                 |
|          | m.13020T>C (Gly228Gly) |          | m.12612A>G (Val92Val)                 |          | m.12612A>G (Val92Val)                 |
|          | m.13734T>C (Phe466Phe) |          | m.13134A>G (Leu266Leu)                |          | m.13134A>G (Leu266Leu)                |
|          |                        |          | m.13708G>A (Ala458Thr)                |          | m.13708G>A (Ala458Thr)                |
|          |                        |          | m.13759G>A (Ala475Thr)                |          | m.13759G>A (Ala475Thr)                |
| MT-CYB   | m.14766C>T (Ile7Thr)   | MT-CYB   | m.14766C>T (Ile7Thr)                  | MT-CYB   | m.14766C>T (Ile7Thr)                  |
|          | m.15326A>G (Thr194Leu) |          | m.15148G>A (Pro134Pro)                |          | m.15148G>A (Pro134Pro)                |
|          |                        |          | m.15257G>A (Asp171Asn)                |          | m.15257G>A (Asp171Asn)                |
|          |                        |          | m.15326A>G (Thr194Leu)                |          | m.15326A>G (Thr194Leu)                |
|          |                        |          | m.15452C>A (Leu236Ile)                |          | m.15452C>A (Leu236Ile)                |
|          |                        |          | m.15679A>G (Lys311Lys)                |          | m.15679A>G (Lys311Lys)                |
| MT-TT    | m.15907A>G             | MT-TT    |                                       | MT-TT    |                                       |
| MT-DLOOP | m.16051A>G             | MT-DLOOP | m.16069C>T                            | MT-DLOOP | m.16069C>T                            |
|          | m.16129G>C             |          | m.16126T>C                            |          | m.16126T>C                            |
|          | m.16183A>C             |          | m.73A>G                               |          | m.73A>G                               |
|          | m.16189T>C             |          | m.150C>T                              |          | m.150C>T                              |
|          | m.16362T>C             |          | m.195T>C                              |          | m.195T>C                              |
|          | m.16519T>C             |          | m.263A>G                              |          | m.263A>G                              |
|          | m.73A>G                |          | m.295C>T                              |          | m.295C>T                              |
|          | m.152T>C               |          | m.310insC                             |          | m.310insC                             |
|          | m.217T>C               |          | m.489T>C                              |          | m.489T>C                              |
|          | m.263A>G               |          | m.514del(CA)                          |          | m.514del(CA)                          |
|          | m.302insCC             |          |                                       |          |                                       |
|          | m.310insC              |          |                                       |          |                                       |
|          | m.340C>T               |          |                                       |          |                                       |
|          | m.508A>G               |          |                                       |          |                                       |
|          | m.514insCA             |          |                                       |          |                                       |

**Supplementary figure 3: mtDNA sequence from Patient 2**

|          |                        |
|----------|------------------------|
| Mutación | 120936/ANA             |
| MT-RNR1  | m.750A>G               |
|          | m.1438A>G              |
| MT-RNR2  | m.2706A>G              |
|          | m.3010G>A              |
| MT-ND1   | m.3394T>C (Tyr30His)   |
|          | m.4216T>C (Tyr304His)  |
| MT-ND2   | m.4769A>G (Met100Met)  |
|          |                        |
| MT-CO1   | m.7028>T (Ala375Ala)   |
|          | m.7142T>C (His413His)  |
|          | m.7184A>G (Pro427Pro)  |
| MT-CO2   |                        |
| MT-TS1   |                        |
| MT-ATP6  | m.8860A>G (Thr112Ala)  |
|          |                        |
| MT-CO3   | m.9531A>G (Thr109Ala)  |
|          | m.9575G>A (Pro123Pro)  |
| MT-ND3   | m.10398A>G (Thr114Ala) |
| MT-ND4L  |                        |
| MT-ND4   | m.11251A>G (Leu164Leu) |
|          | m.11719G>A (Gly320Gly) |
|          |                        |
|          |                        |
| MT-TL2   |                        |
| MT-ND5   | m.12612A>G (Val92Val)  |
|          | m.13708G>A (Ala458Thr) |
|          |                        |
|          |                        |
| MT-CYB   | m.14766C>T (Ile7Thr)   |
|          | m.14798T>C (Phe18Leu)  |
|          | m.15326A>G (Thr194Leu) |
|          | m.15452C>A (Leu236Phe) |
|          |                        |
| MT-TT    |                        |
| MT-DLOOP | m.16069C>T             |
|          | m.16126T>C             |
|          | m.16311T>C             |
|          | m.73A>G                |
|          | m.185G>A               |
|          | m.228G>A               |
|          | m.263A>G               |
|          | m.295C>T               |
|          | m.310insC              |
|          | m.462C>T               |
|          | m.482T>C               |
|          | m.489T>C               |

**Figure S4. mtDNA sequence from family of patient 2.**

| FATHER   |                                                                                                         | MOTHER   |                                                                                                                                                    | BROTHER  |                                                                                                                                                    |
|----------|---------------------------------------------------------------------------------------------------------|----------|----------------------------------------------------------------------------------------------------------------------------------------------------|----------|----------------------------------------------------------------------------------------------------------------------------------------------------|
| Mutación | 120938/Francisco                                                                                        | Mutación | 120937/Lorenza                                                                                                                                     | Mutación | 120939/Jose Antonio                                                                                                                                |
| MT-RNR1  | m.750A>G<br>m.1438A>G                                                                                   | MT-RNR1  | m.750A>G<br>m.1438A>G                                                                                                                              | MT-RNR1  | m.750A>G<br>m.1438A>G                                                                                                                              |
| MT-RNR2  |                                                                                                         | MT-RNR2  | m.2706A>G<br>m.3010G>A                                                                                                                             | MT-RNR2  | m.2706A>G<br>m.3010G>A                                                                                                                             |
| MT-ND1   | m.3777T>C (Ser157Ser)<br>m.3915G>A (Gly203Gly)                                                          | MT-ND1   | m.3394T>C (Tyr30His)<br>m.4216T>C (Tyr304His)                                                                                                      | MT-ND1   | m.3394T>C (Tyr30His)<br>m.4216T>C (Tyr304His)                                                                                                      |
| MT-ND2   | m.4727A>G (Met186Met)<br>m.4769A>G (Met100Met)                                                          | MT-ND2   | m.4769A>G (Met100Met)                                                                                                                              | MT-ND2   | m.4769A>G (Met100Met)                                                                                                                              |
| MT-CO1   |                                                                                                         | MT-CO1   | m.7028C>T (Ala375Ala)<br>m.7142T>C (His413His)<br>m.7184A>G (Pro427Pro)                                                                            | MT-CO1   | m.7028C>T (Ala375Ala)<br>m.7142T>C (His413His)<br>m.7184A>G (Pro427Pro)                                                                            |
| MT-CO2   | m.7805G>A (Val74Ile)                                                                                    | MT-CO2   |                                                                                                                                                    | MT-CO2   |                                                                                                                                                    |
| MT-TS1   |                                                                                                         | MT-TS1   |                                                                                                                                                    | MT-TS1   |                                                                                                                                                    |
| MT-ATP6  | m.8860A>G (Thr112Ala)                                                                                   | MT-ATP6  | m.8860A>G (Thr112Ala)                                                                                                                              | MT-ATP6  | m.8860A>G (Thr112Ala)                                                                                                                              |
| MT-CO3   | m.9380G>A (Trp58Trp)                                                                                    | MT-CO3   | m.9531A>G (Thr109Ala)<br>m.9575G>A (Pro123Pro)                                                                                                     | MT-CO3   | m.9531A>G (Thr109Ala)<br>m.9575G>A (Pro123Pro)                                                                                                     |
| MT-ND3   |                                                                                                         | MT-ND3   | m.10398A>G (Thr114Ala)                                                                                                                             | MT-ND3   | m.10398A>G (Thr114Ala)                                                                                                                             |
| MT-ND4L  |                                                                                                         | MT-ND4L  |                                                                                                                                                    | MT-ND4L  |                                                                                                                                                    |
| MT-ND4   | m.11253T>C (Ile165Thr)                                                                                  | MT-ND4   | m.11251A>G (Leu164Leu)<br>m.11719G>A (Gly320Gly)                                                                                                   | MT-ND4   | m.11251A>G (Leu164Leu)<br>m.11719G>A (Gly320Gly)                                                                                                   |
| MT-TL2   |                                                                                                         | MT-TL2   |                                                                                                                                                    | MT-TL2   |                                                                                                                                                    |
| MT-ND5   |                                                                                                         | MT-ND5   | m.12612A>G (Val92Val)<br>m.13708G>A (Ala458Thr)                                                                                                    | MT-ND5   | m.12612A>G (Val92Val)<br>m.13708G>A (Ala458Thr)                                                                                                    |
| MT-CYB   | m.15326A>G (Thr194Ala)                                                                                  | MT-CYB   | m.14766C>T (Ile7Thr)<br>m.14798T>C (Phe18Leu)<br>m.15326A>G (Thr194Leu)<br>m.15452C>A (Leu236Phe)                                                  | MT-CYB   | m.14766C>T (Ile7Thr)<br>m.14798T>C (Phe18Leu)<br>m.15326A>G (Thr194Leu)<br>m.15452C>A (Leu236Phe)                                                  |
| MT-TT    |                                                                                                         | MT-TT    |                                                                                                                                                    | MT-TT    |                                                                                                                                                    |
| MT-DLOOP | m.16362T>C<br>m.16482A>G<br>m.150C>T<br>m.239T>C<br>m.263A>G<br>m.302insCC<br>m.310insC<br>m.514ins(CA) | MT-DLOOP | m.16069C>T<br>m.16126T>C<br>m.16311T>C<br>m.73A>G<br>m.185G>A<br>m.228G>A<br>m.263A>G<br>m.295C>T<br>m.310insC<br>m.462C>T<br>m.482T>C<br>m.489T>C | MT-DLOOP | m.16069C>T<br>m.16126T>C<br>m.16311T>C<br>m.73A>G<br>m.185G>A<br>m.228G>A<br>m.263A>G<br>m.295C>T<br>m.310insC<br>m.462C>T<br>m.482T>C<br>m.489T>C |
